# Supplementary material
Source: publisher figshare collection journal article supplement (https://frontiersin.figshare.com/ndownloader/files/14699990)
Supplement: Supplementary file [file 14699990]

Tian et al.  
Supplemental Figures

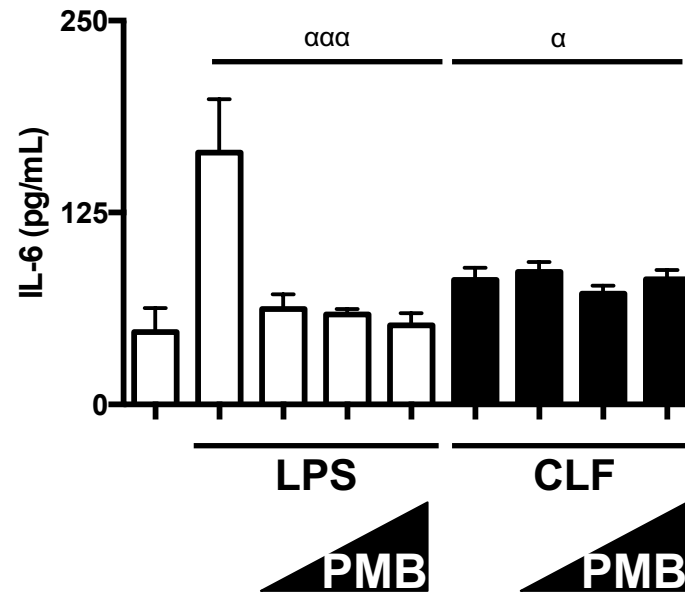

**Figure S1.** Human Umbilical Vein Endothelial Cells (HUVEC) respond to CLF but inflammatory response is not blocked by polymyxin B (PMB). HUVEC were treated with LPS (10μg/mL) or CLF (10μg/mL, from wild type C57BL/6 mice) and increasing amounts of polymyxin B were also co-administered (1ng/mL, 10ng/mL, and 100ng/mL). IL-6 levels measured by ELISA after overnight treatment.

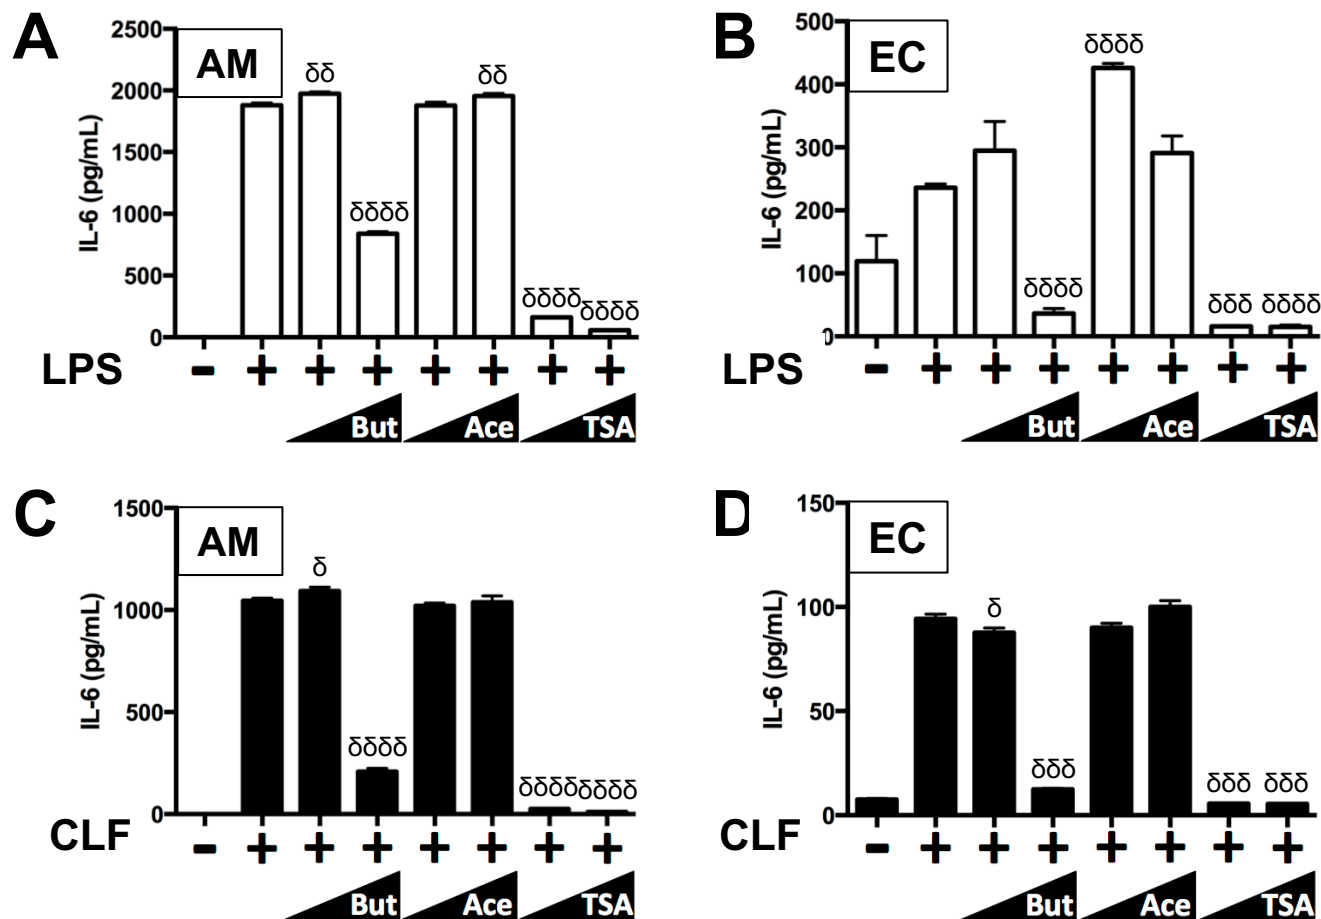

**Figure S2.** CLF mirrors LPS in its effects on mouse alveolar macrophage (AM) and HUVEC (EC) vis-à-vis HDAC inhibition by high concentration butyrate and trichostatin A (TSA), but not acetate. IL-6 levels from AM (A, C) and HUVEC (B, D) after being stimulated with LPS (A, B; 100ng/mL) and CLF (C, D; 50mcg/mL) from WT C57BL/6 mice. Cells were also co-incubated with low and high-dose butyrate (But; 0.2mM and 2mM), acetate (Ace; 0.1mM and 1mM), and TSA (10nM and 50nM). For comparisons against an untreated or control condition (e.g. in (A) and (B) LPS treatment only and in (C) and (D) CLF treatment only), p values are represented as follows:  $\delta < 0.05$ ;  $\delta\delta < 0.01$ ;  $\delta\delta\delta < 0.001$ ;  $\delta\delta\delta\delta < 0.0001$ . All experiments were performed at least twice and representative data are shown.

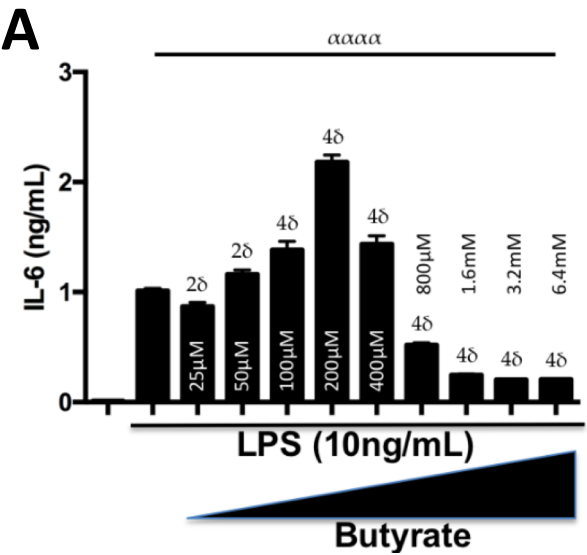

**Figure S3.** Analyzing the low and high dose effects of butyrate on a battery of immune gene products produced when AMs are challenged with LPS or CLF.

- (A) IL-6 levels after LPS challenge and wide range of butyrate doses.
- (B) Immune genes regulated similarly by butyrate after LPS and CLF challenge (**bold**). Immune genes regulated differently by butyrate after LPS and CLF challenge (*italics*).

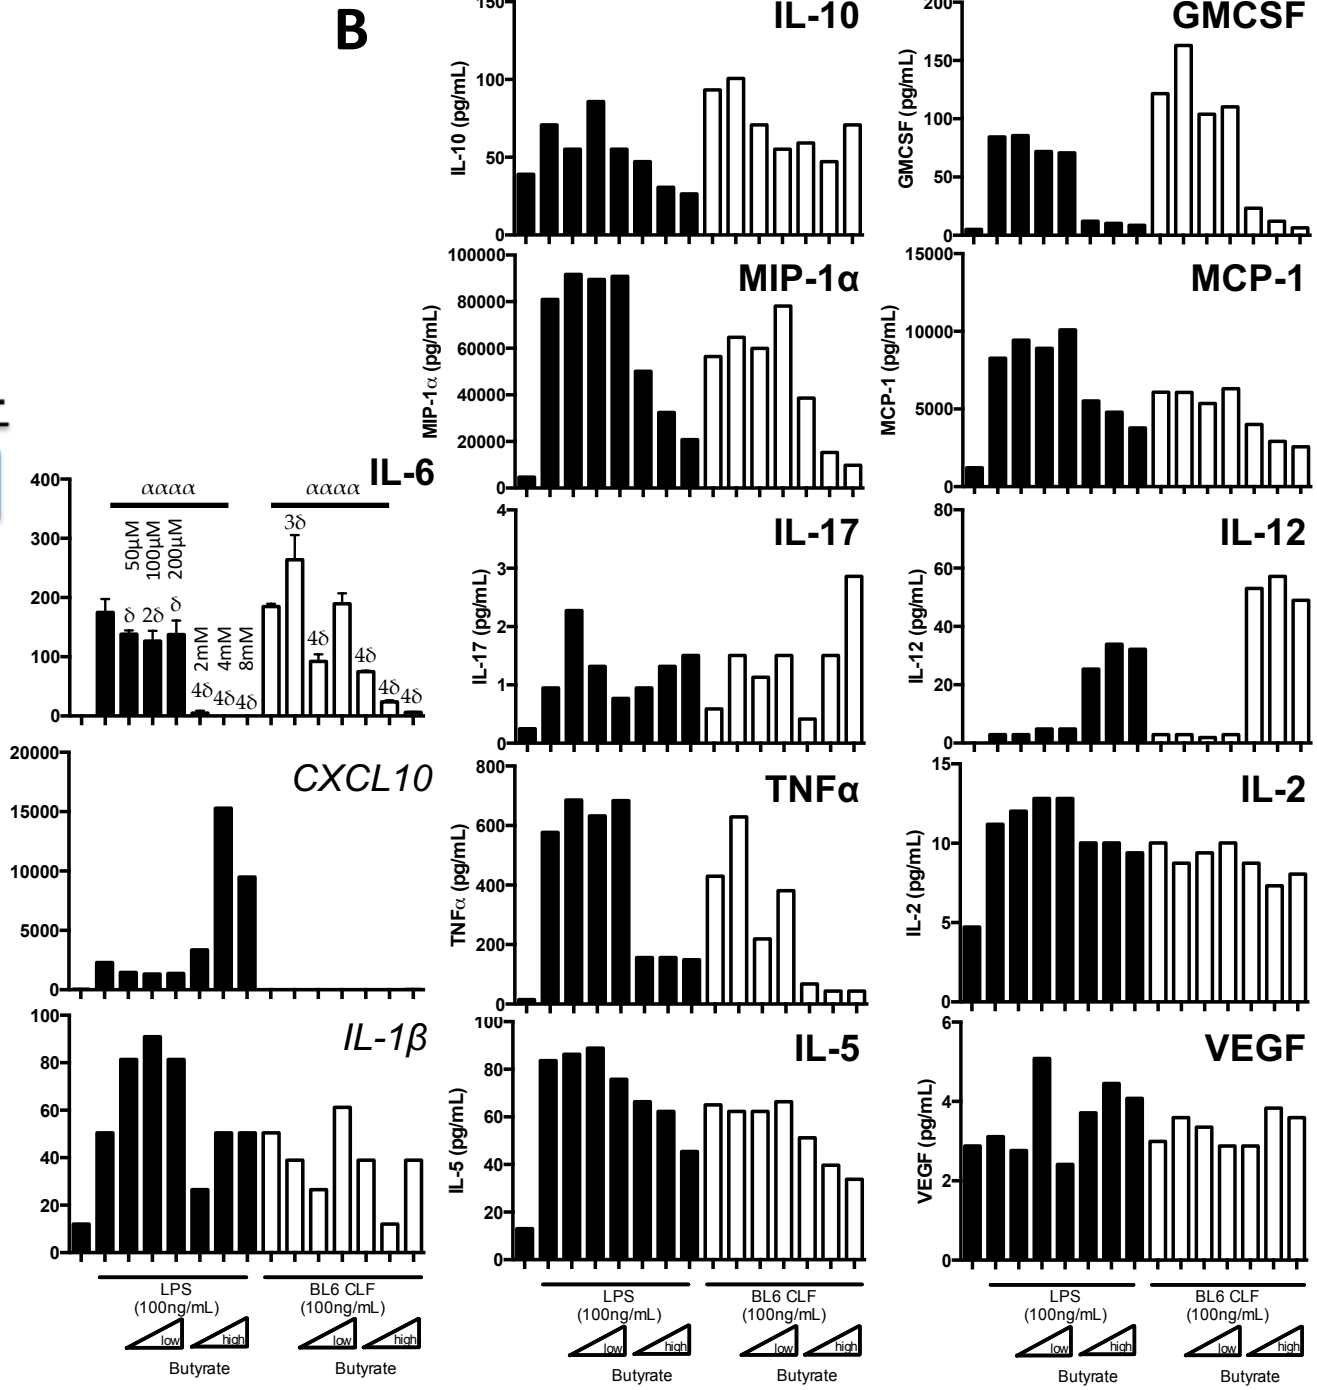

Supplemental Figure S3



| mM              | C57 BL/6 WT CLF | C3H WT CLF | C3H WT CLF (+Abx) |
|-----------------|-----------------|------------|-------------------|
| Formic Acid     | 21.492          | 94.995     | 92.8875           |
| Acetic Acid     | 19.2155         | 35.873     | 6.49              |
| Propionic Acid  | 1.349           | 1.9695     | 32.209            |
| Butyric Acid    | 13.3665         | 19.4235    | 17.745            |
| Isobutyric Acid | ND              | ND         | ND                |
| Isovaleric Acid | 3.4525          | 7.6835     | 4.131             |
| Valeric Acid    | 0.848           | 2.995      | 2.385             |
| Caproic Acid    | 0.131           | 0.8845     | 0.6565            |
| Heptanoic Acid  | ND              | 2.506      | 11.4635           |

ND = not detected

| Concentration (μM) | His    | Ser     | Arg     | Gly     | Asp     | Glu     | Thr    | Ala    | Phe    |
|--------------------|--------|---------|---------|---------|---------|---------|--------|--------|--------|
| C57 BL/6 WT CLF    | 25.933 | 95.036  | 108.17  | 140.903 | 96.084  | 171.919 | 77.318 | 11.189 | 28.103 |
| C3H WT CLF         | 26.616 | 91.145  | 108.735 | 123.249 | 132.296 | 203.59  | 84.297 | 13.909 | 35.539 |
| C3H WT CLF (+Abx)  | 26.604 | 111.231 | 135.903 | 149.16  | 109.54  | 160.64  | 92.666 | 10.818 | 29.481 |

  

|                   | Pro     | Cys   | Lys    | Tyr    | Met    | Val     | Ile    | Leu     |
|-------------------|---------|-------|--------|--------|--------|---------|--------|---------|
| C57 BL/6 WT CLF   | 78.079  | 1.417 | 70.269 | 52.123 | 9.227  | 127.019 | 68.606 | 146.054 |
| C3H WT CLF        | 87.609  | 1.336 | 94.385 | 61.178 | 18.494 | 136.524 | 85.156 | 177.22  |
| C3H WT CLF (+Abx) | 128.464 | 1.83  | 73.338 | 49.419 | 12.588 | 133.406 | 77.118 | 155.327 |

**Table ST1.** Measured levels of SCFAs (including medium and branch chain fatty acids) and amino acids from Colonic lumen filtrate (CLF) C57BL/6 wildtype, C3H/HeOuJ wildtype mice treated with control water and C3H/HeOuJ wildtype mice treated with antibiotic (+Abx) water.

Supplemental Table ST1

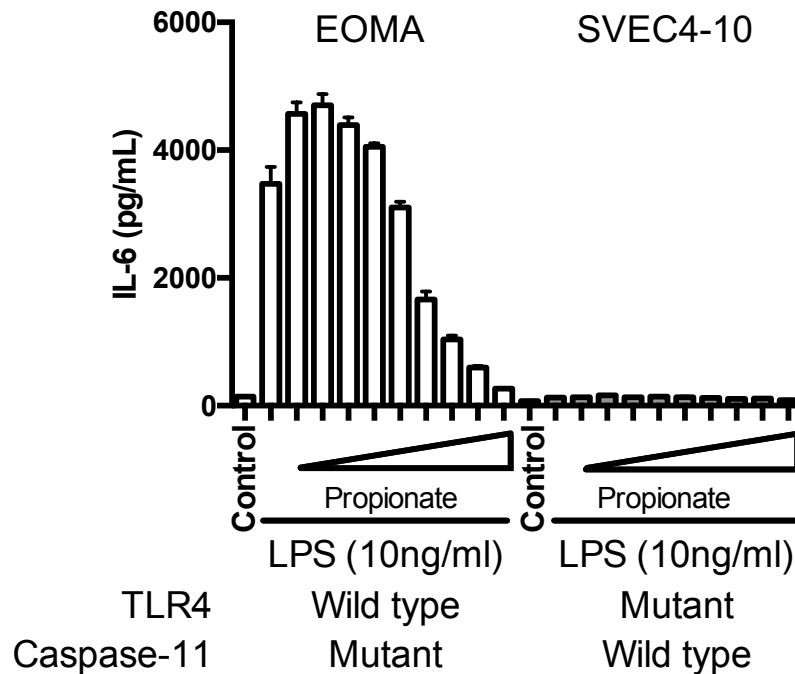

**Figure S4.** TLR4 (and not caspase-11) sensing of LPS is required for propionate effects. EOMA (left, 129 background, TLR4 wild type, Caspase-11 mutant), and SVEC4-10 (right, C3H/HeJ background, TLR4 mutant, Caspase-11 wild type) endothelial cell lines were treated with a wide dose range of propionate (25 $\mu$ M-6.4mM) either in the presence or absence of LPS (10ng/mL) and overnight production of IL-6 by ELISA was measured.

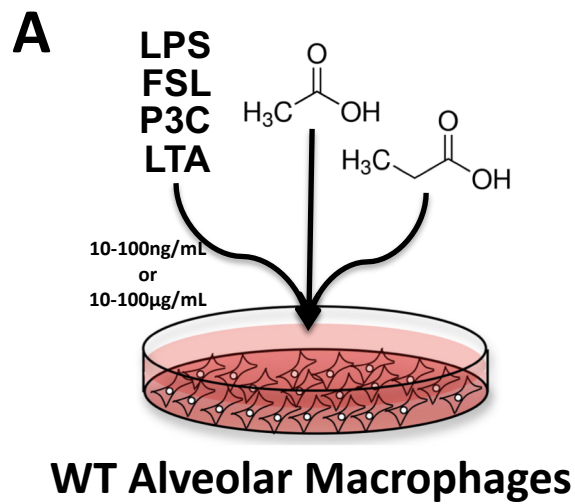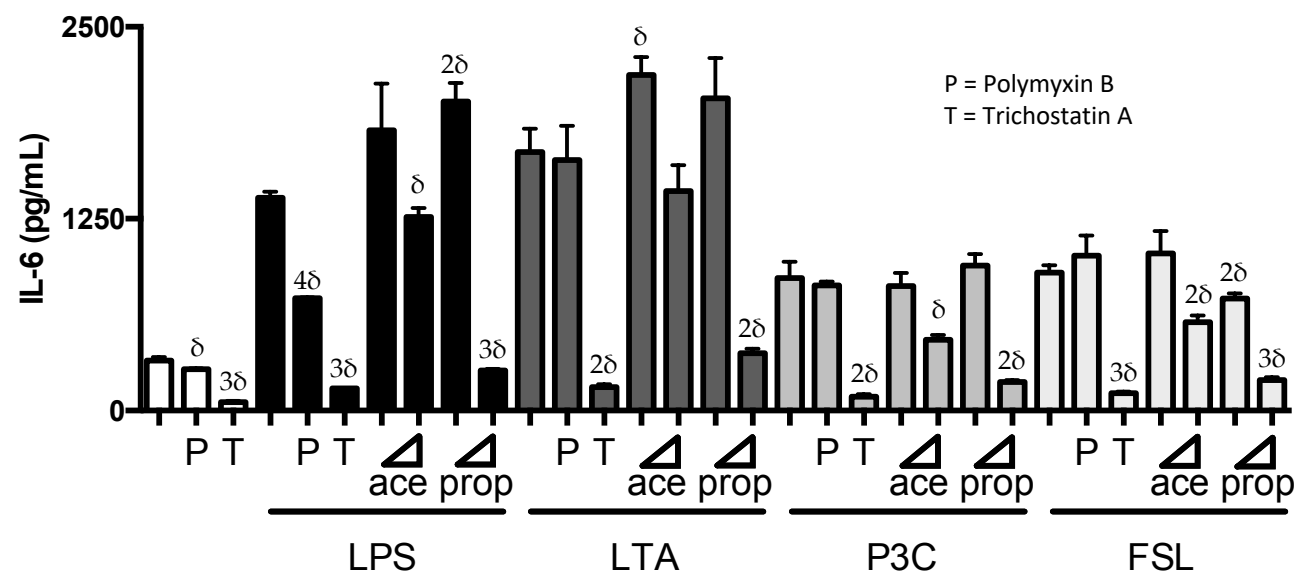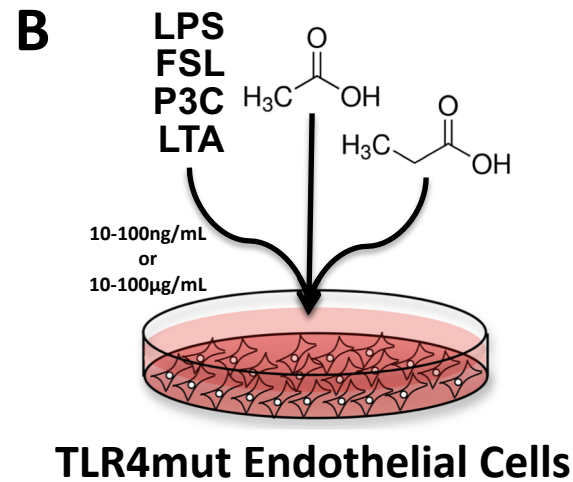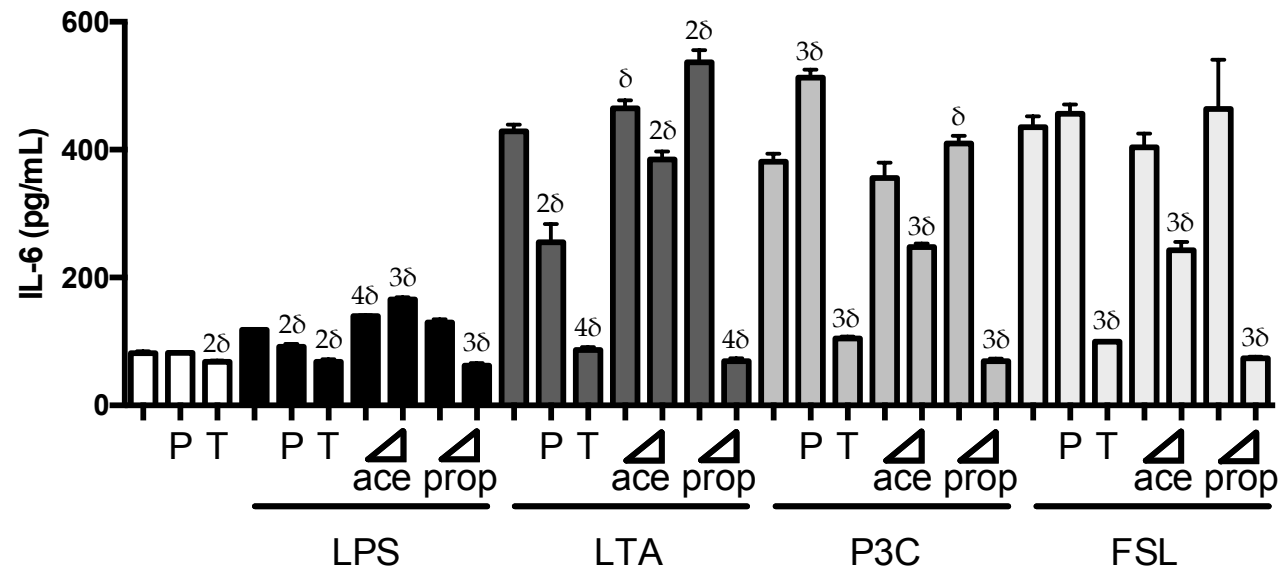

**Figure S5. The inflammatory response to TLR2 ligands can also be enhanced or sustained by acetate and low-dose propionate and inhibited by high-dose propionate.** (A) MH-S WT AMs or (B) SVEC4-10 TLR4mut ECs or challenged with either LPS or LTA, P3C, FSL (all TLR2 ligands) in the presence of low and high acetate and propionate, polymyxin B, or trichostatin A. After overnight incubation, IL-6 levels were measured. PolymyxinB (P) used as a LPS inhibitor and Trichostatin A (T) as an HDAC inhibitor.

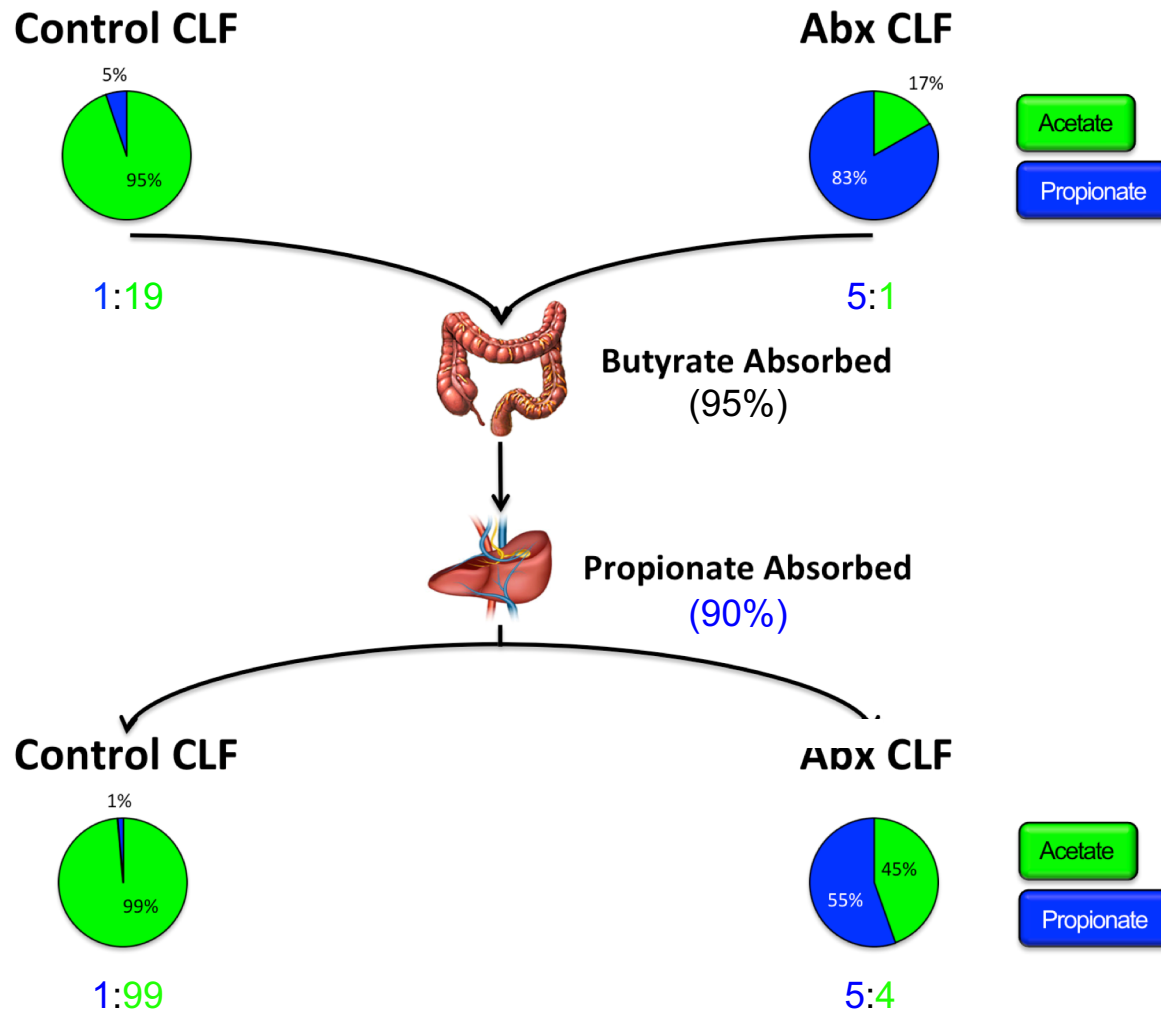

**Figure S6. Differences in propionate:acetate ratios between control and antibiotic-exposed CLF are present in peripheral blood even after accounting for absorption by gut and liver.** Ratios of the SCFAs are represented with acetate denoted in green and propionate in blue. Based on the estimates for intestinal and liver absorption reported by Boets et al. (2015), namely 90% propionate and 95% butyrate absorption, the estimated changes in ratios of SCFAs between the CLF and peripheral circulation (and the pulmonary circulation) are shown.

## Lung Injury – Histology – ordered by severity

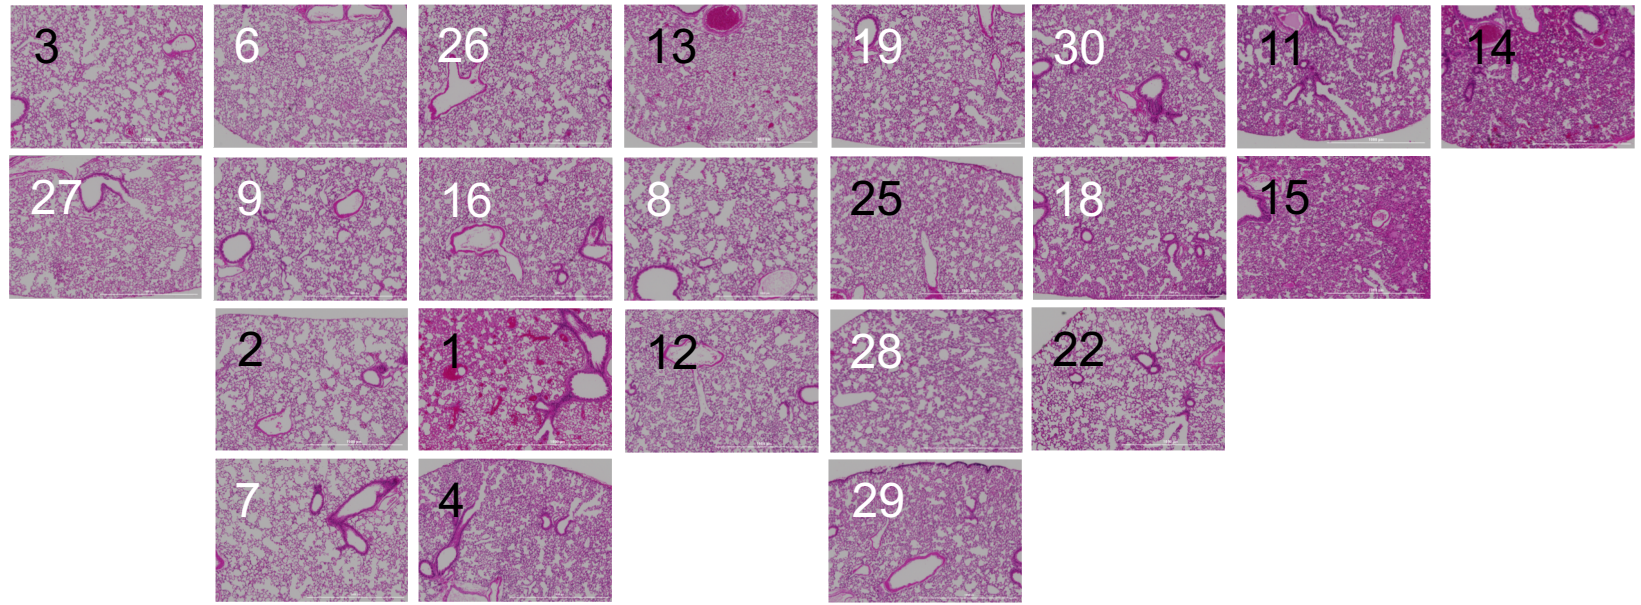

Lung  
Injury  
Score

**Figure S7.** Left lung injury assessment by histology after 3h of reperfusion following 1h of left lung ischemia; histological images have been ordered from left to right by increasing lung injury score (LIS), as determined by average %area (see Supplemental Figure ST2). Lungs from mice that received control water are numbered in white text, and mice that received antibiotic water in black text.

## Lung Injury Scoring

| Mouse ID | Average Lung Injury Score | Average %area | Average count |
|----------|---------------------------|---------------|---------------|
| 401 (29) | 3.666666667               | 5.592         | 7328          |
| 402 (28) | 2.333333333               | 5.737         | 8034.5        |
| 403 (27) | 2.666666667               | 2.307         | 4975          |
| 404 (30) | 3.5                       | 6.983         | 7963          |
| 405 (26) | 1.75                      | 4.587         | 5622.5        |
| 406 (18) | 3.5                       | 7.3435        | 8265          |
| 408 (19) | 2.333333333               | 5.8345        | 6571.5        |
| 410 (16) | 2                         | 4.317         | 5663          |
| 411 (6)  | 2                         | 3.6555        | 5620.5        |
| 412 (9)  | 1.75                      | 3.5145        | 5410          |
| 413 (7)  | 1                         | 3.7           | 5002          |
| 415 (8)  | 1.75                      | 5.2685        | 5695.5        |
| 418 (22) | 3.5                       | 7.068         | 6170.5        |
| 420 (25) | 3.75                      | 5.6575        | 5535.5        |
| 421 (13) | 4                         | 4.9145        | 6056.5        |
| 422 (11) | 4                         | 9.5165        | 6735          |
| 423 (12) | 1.75                      | 5.071         | 5880          |
| 424 (15) | 4.5                       | 8.511         | 6714.5        |
| 425 (14) | 5                         | 15.272        | 8388          |
| 427 (4)  | 3                         | 4.504         | 6373          |
| 428 (2)  | 1                         | 3.2695        | 4412          |
| 429 (3)  | 1                         | 2.867         | 4082          |
| 430 (1)  | 3.75                      | 4.489         | 4670.5        |
| Average  | 2.760869565               | 5.651282609   | 6137.73913    |
| Cutoff   | 2.67                      | 5.592         | 6056.5        |

**Table ST2.** Lung Injury Scores (LIS) for mice after lung IR. This table supports the data shown in Figure S8. Average Lung injury score refers to the semi-quantitative measurement as previously described (12); average %area and average count are measured using ImageJ as described in the methods section. Red cells = high injury score.

## Alpha diversity

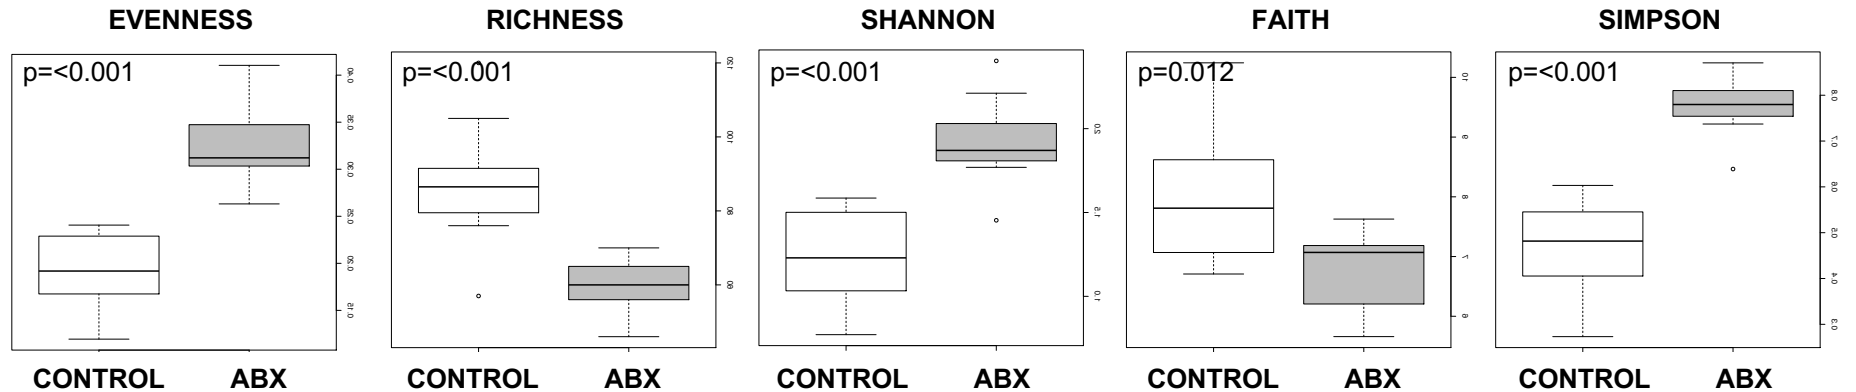

**Figure S8.** 16S microbiome profiling comparing alpha diversity of the control group vs. antibiotic group. Alpha diversity is represented in terms of Evenness, Richness, as well as Shannon, Faith and Simpson Phylogenetic Diversity Indices. None of the differences in alpha diversity are significant at week 1 while all are significant at week 7 by Kruskal-Wallis and ANOVA with p values all  $< 0.001$  except for Faith's Phylogenetic Diversity Index (0.012 & 0.004). K-W p values denoted.

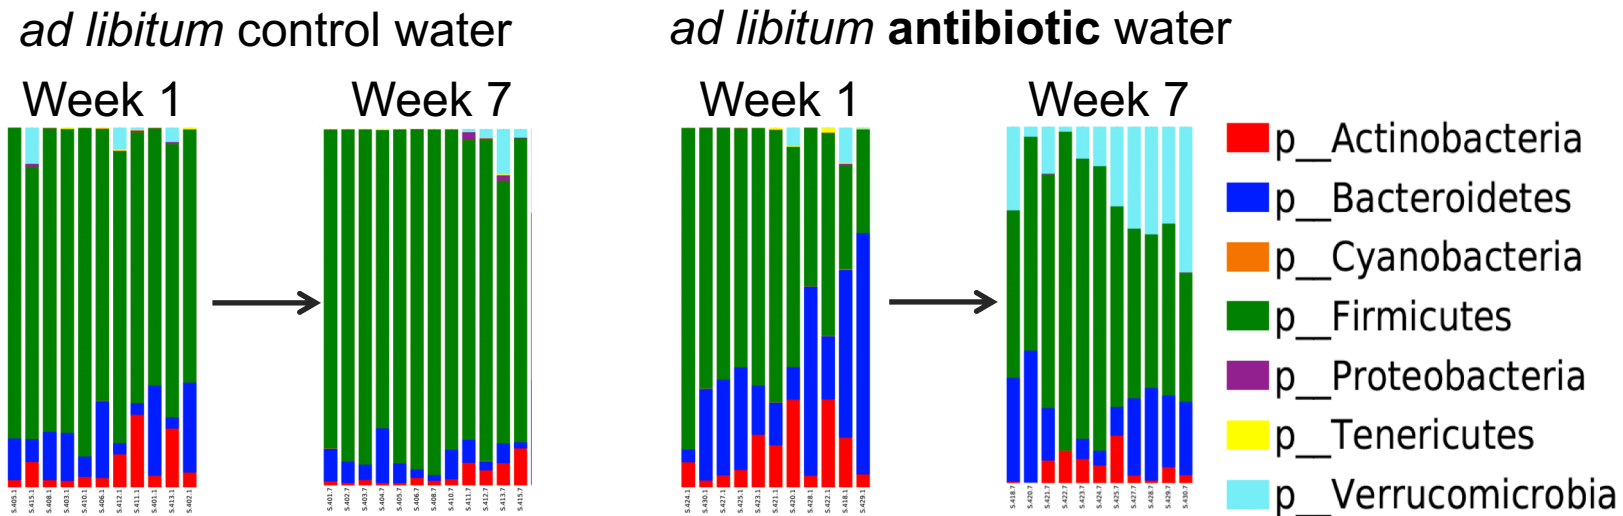

**Figure S9.** Two cohorts of wild type C3H mice were either given control drinking or antibiotic water containing Neomycin/Polymyxin B for 8 weeks. Stool pellets were collected weekly and at week 8, mice received left lung IR surgery. Stool from week 1 and 7 were processed for 16S microbiome profiling and phylum-level enrichment is presented. 16S sequencing and profiling for one sample from week 1 (control water) failed.



# Week 7 Alpha diversity based on Average Lung Injury Scoring (LIS)

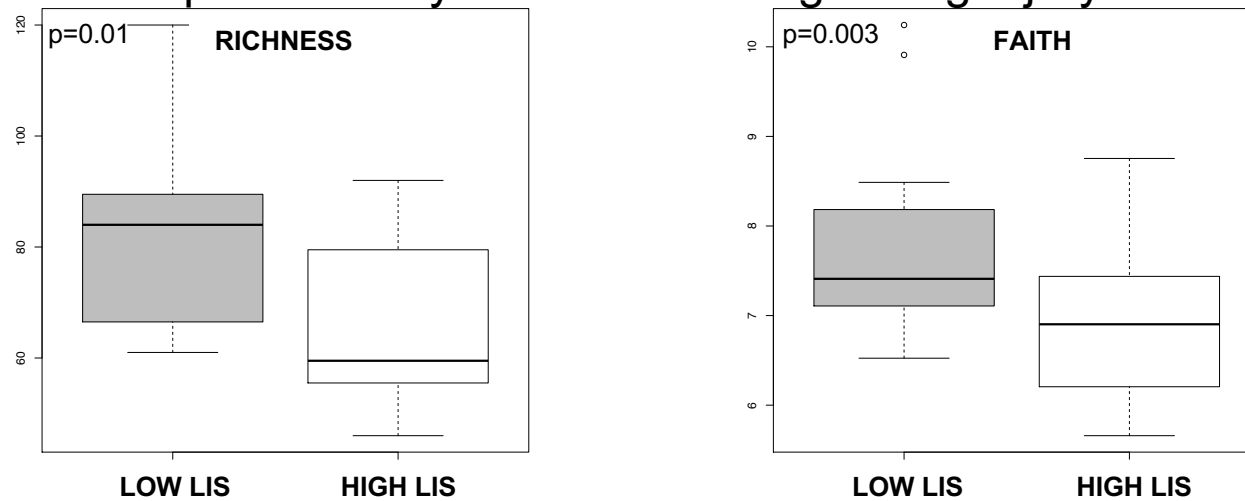

| Enriched in HIGH lung Injury Group |           |         |           |           |           |           |         |         |            |            |          |
|------------------------------------|-----------|---------|-----------|-----------|-----------|-----------|---------|---------|------------|------------|----------|
| OTUname                            | pois.pval | nb.pval | zlnb.pval | best.mod  | qval.best | mean_diff | zerotr1 | zerotr2 | nonzerotr1 | nonzerotr2 | totaltr1 |
| 94 OTU_41                          | 7.86E-18  | 0.025   | 0.06686   | NegBin    | 0.16317   | -14.5985  | 6       | 9       | 5          | 3          | 9        |
| 54 OTU_244                         | 4.13E-05  | 0.252   | 0.01252   | Zl-NegBin | 0.12457   | -2.84848  | 8       | 9       | 3          | 3          | 9        |
| Enriched in LOW Lung Injury Group  |           |         |           |           |           |           |         |         |            |            |          |
| OTUname                            | pois.pval | nb.pval | zlnb.pval | best.mod  | qval.best | mean_diff | zerotr1 | zerotr2 | nonzerotr1 | nonzerotr2 | totaltr1 |
| 2 OTU_10                           | 0         | NA      | #####     | Zl-NegBin | 0.00373   | 372.3864  | 3       | 6       | 8          | 6          | 4539     |
| 122 OTU_7                          | 1.06E-146 | 0.054   | 0.02824   | Zl-NegBin | 0.1649    | 138.3712  | 0       | 3       | 11         | 9          | 2480     |
| 78 OTU_31                          | 6.48E-65  | NA      | 0.00096   | Zl-NegBin | 0.02985   | 62.56061  | 8       | 11      | 3          | 1          | 712      |
| 31 OTU_15                          | 8.29E-73  | 0.015   | 0.0135    | NegBin    | 0.13648   | 50.38636  | 2       | 3       | 9          | 9          | 678      |
| 109 OTU_57                         | 2.26E-10  | 2E-04   | 0.00013   | NegBin    | 0.0118    | 15.01515  | 5       | 11      | 6          | 1          | 167      |
| 60 OTU_27                          | 3.43E-19  | 0.116   | 0.00763   | Zl-NegBin | 0.11217   | 13.31818  | 5       | 6       | 6          | 6          | 196      |
| 104 OTU_52                         | 3.21E-15  | 0.005   | 0.00482   | NegBin    | 0.08802   | 9.651515  | 3       | 7       | 8          | 5          | 119      |
| 99 OTU_47                          | 8.25E-08  | NA      | 0.0128    | Zl-NegBin | 0.12457   | 7.227273  | 7       | 9       | 4          | 3          | 151      |
| 128 OTU_77                         | 1.02E-09  | 0.019   | #####     | Zl-NegBin | 5.30E-05  | 5.962121  | 7       | 8       | 4          | 4          | 72       |
| 83 OTU_33                          | 4.91E-07  | 0.017   | 0.05952   | NegBin    | 0.14812   | 5.871212  | 0       | 3       | 11         | 9          | 115      |
| 88 OTU_34                          | 6.68E-07  | 0.034   | 0.03372   | NegBin    | 0.18929   | 5.55303   | 0       | 3       | 11         | 9          | 106      |
| 95 OTU_42                          | 6.67E-06  | 0.028   | 0.0281    | NegBin    | 0.1649    | 3.484848  | 3       | 5       | 8          | 7          | 53       |
| 138 OTU_87                         | 2.09E-05  | 0.002   | 0.00186   | NegBin    | 0.05658   | 3.469697  | 5       | 10      | 6          | 2          | 40       |
| 102 OTU_50                         | 2.42E-06  | 0.021   | 0.0205    | NegBin    | 0.15427   | 3.431818  | 4       | 8       | 7          | 4          | 46       |
| 135 OTU_84                         | 7.94E-06  | 0.023   | 0.00207   | NegBin    | 0.15813   | 3.045455  | 6       | 8       | 5          | 4          | 39       |
| 117 OTU_64                         | 8.51E-05  | 0.037   | 0.03653   | NegBin    | 0.19759   | 2.742424  | 2       | 7       | 9          | 5          | 43       |
| 96 OTU_43                          | 0.00013   | 0.005   | 0.00365   | NegBin    | 0.08802   | 2.560606  | 5       | 11      | 6          | 1          | 30       |
| 115 OTU_62                         | 8.31E-05  | 0.048   | 0.00095   | NegBin    | 0.24006   | 2.416667  | 7       | 6       | 4          | 6          | 33       |
| 121 OTU_69                         | 0.000681  | 0.012   | 0.01232   | NegBin    | 0.12457   | 1.977273  | 2       | 7       | 9          | 5          | 30       |
| 57 OTU_250                         | 0.001867  | 0.106   | 0.00975   | Zl-NegBin | 0.12457   | 1.916667  | 5       | 6       | 6          | 6          | 33       |
| 106 OTU_54                         | 0.020286  | 0.023   | NA        | Poisson   | 0.15427   | 1.893939  | 0       | 0       | 11         | 12         | 52       |
| 118 OTU_65                         | 0.02059   | NA      | 0.00102   | Zl-NegBin | 0.02985   | 1.636364  | 6       | 5       | 5          | 7          | 40       |
| 20 OTU_123                         | 0.00454   | 0.008   | 0.00768   | NegBin    | 0.11217   | 1.462121  | 4       | 11      | 7          | 1          | 17       |
| 38 OTU_184                         | 0.002589  | 0.02    | 0.01995   | NegBin    | 0.15427   | 1.386364  | 4       | 10      | 7          | 2          | 18       |
| 129 OTU_78                         | 0.010604  | 0.013   | 0.01278   | Poisson   | 0.12457   | 1.098485  | 4       | 11      | 7          | 1          | 13       |
| 132 OTU_80                         | 0.025704  | 0.028   | 0.0281    | Poisson   | 0.16317   | 0.954545  | 2       | 6       | 9          | 6          | 16       |
| 24 OTU_131                         | 0.041097  | 0.062   | 0.05649   | Poisson   | 0.21429   | 0.643939  | 7       | 11      | 4          | 1          | 8        |

**Figure S10.** Alpha diversity and Taxonomic enrichment in low vs. high lung injury groups as defined by average lung injury score (LIS) (as described in table ST2). All Clostridiales are highlighted in yellow and all Bacteroidales are highlighted in orange. Differences in alpha diversity are significant ( $p < 0.05$ ) between low and high LIS at week 7 for richness, evenness, and all phylogenetic diversity indices by Kruskal-Wallis (K-W) and ANOVA (except K-W  $p = 0.065$  for Shannon diversity index). K-W p values denoted.
